# Supplementary material for: Direct detection of nucleotide radical cations produced by electron-transfer oxidation of DNA bases with electron-transfer state of 9-mesityl-10-methylacridinium ion and resulting efficient DNA cleavage without oxygen
Source: Royal Society of Chemistry journal article supplement (doi:10.1039/b601418f), 2006-01-01
Supplement: b601418f.pdf [file b601418f.pdf]

## **Electronic Supplementary Information**

**Direct detection of nucleotide radical cations produced by electron-transfer oxidation of DNA bases with electron-transfer state of 9-mesityl-10-methylacridinium ion and resulting efficient DNA cleavage without oxygen**

Kei Ohkubo, Kazusa Yukimoto, and Shunichi Fukuzumi\*

*Department of Material and Life Science, Graduate School of Engineering, Osaka University, SORST, Japan Science and Technology Agency (JST), Suita, Osaka 565-0871, Japan*

\* To whom correspondence should be addressed.

E-mail: [fukuzumi@chem.eng.osaka-u.ac.jp](mailto:fukuzumi@chem.eng.osaka-u.ac.jp).

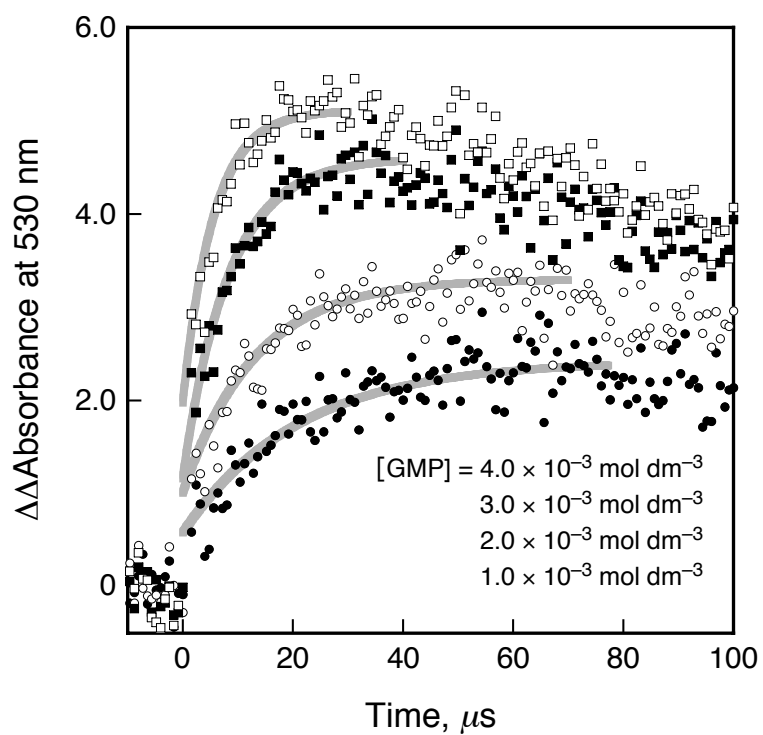

**Fig. S1** Absorbance time profiles at 530 nm due to  $\text{GMP}^{*+}$  in the photoinduced ET oxidation of GMP with  $\text{Acr}^{+}\text{-Mes}$  in deaerated  $5 \text{ mmol dm}^{-3}$  KCl/HCl buffer (pH 2.0).

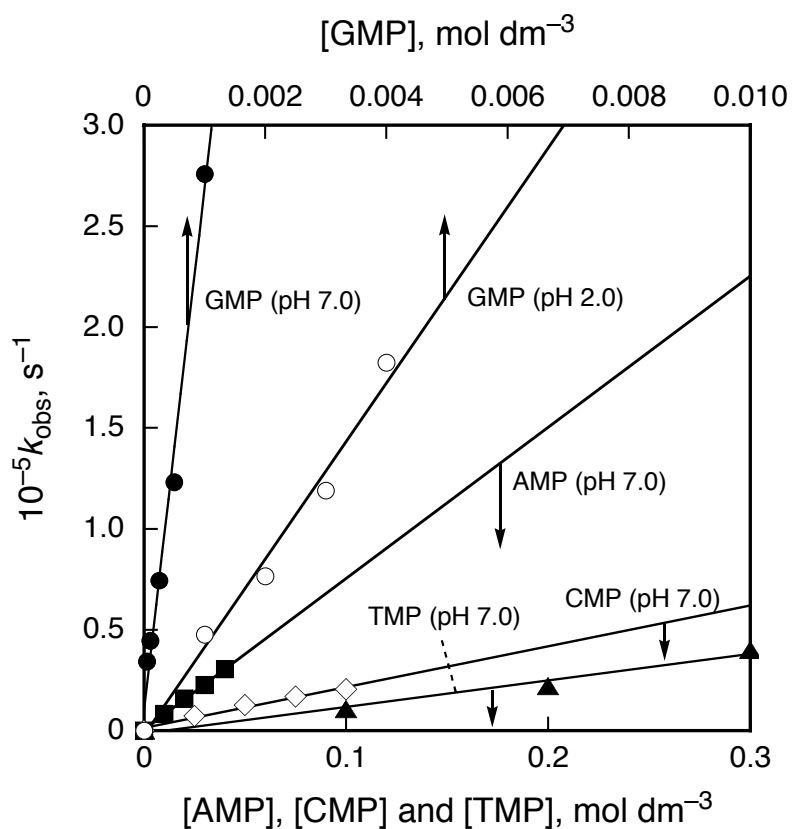

**Fig. S2** Plots of pseudo-first-order rate constants ( $k_{\text{obs}}$ ) vs [GMP] (○: pH 2.0, ●: pH 7.0), [AMP] (■), [CMP] (◇) and [TMP] (▲) for formation of nucleotide radical cations in the photoinduced ET oxidation of nucleotides with  $\text{Acr}^+-\text{Mes}$  in  $5 \text{ mmol dm}^{-3}$  KCl/HCl (pH 2.0) or Tris/HCl (pH 7.0) buffer at 298 K.

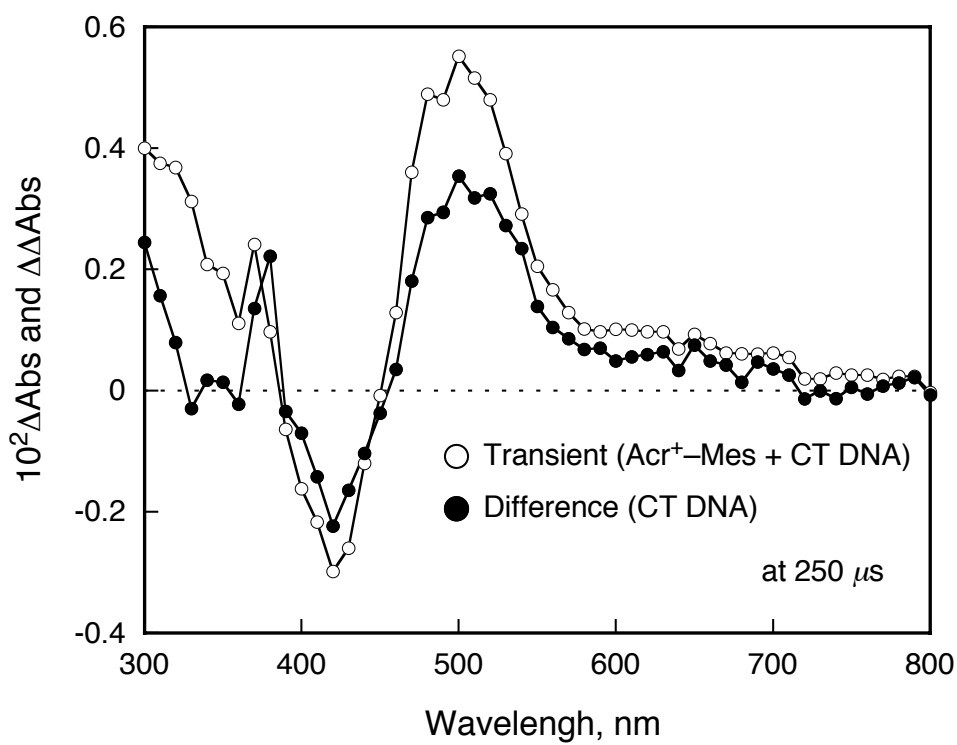

**Fig. S3** Transient absorption spectrum of Acr<sup>+</sup>–Mes (6.0 × 10<sup>-5</sup> mol dm<sup>-3</sup>) in the presence of calf thymus DNA (CT DNA) (1.0 × 10<sup>-3</sup> mol dm<sup>-3</sup>) and the difference spectrum of DNA radical cation at pH 7.0. measured at 250 μs after laser excitation at λ = 355 nm at 298 K.

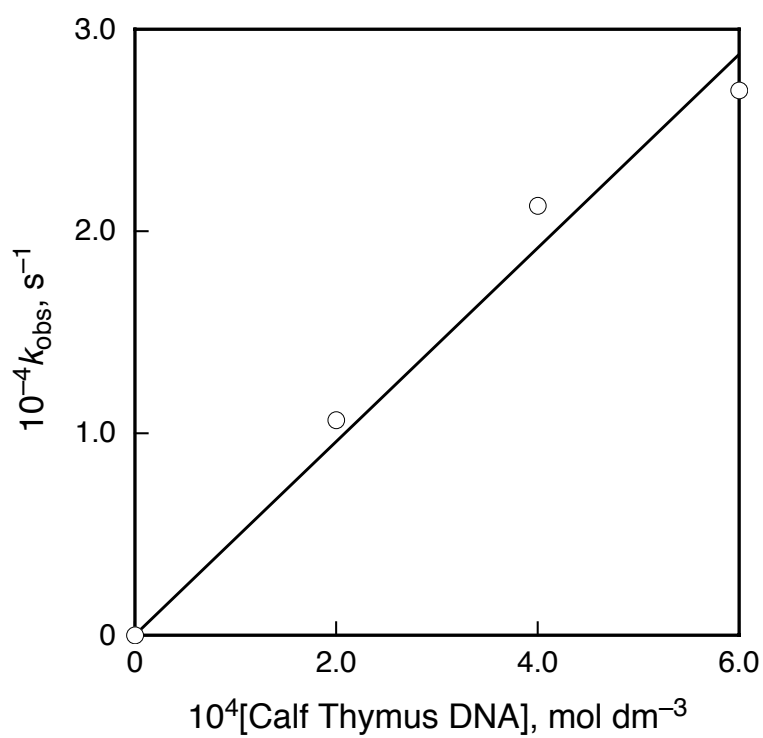

**Fig. S4** Plot of the pseudo-first-order rate constant ( $k_{\text{obs}}$ ) vs [Calf Thymus DNA] for formation of DNA radical cation in the photoinduced ET oxidation of Calf thymus DNA with  $\text{Acr}^+$ -Mes in  $5 \text{ mmol dm}^{-3}$  Tris/HCl buffer (pH 7.0) at 298 K.
